# Supplementary material
Source: PubMed Central journal article supplement (PMC3395240)
Supplement: NIHMS224273-supplement-1.pdf [file NIHMS224273-supplement-1.pdf]

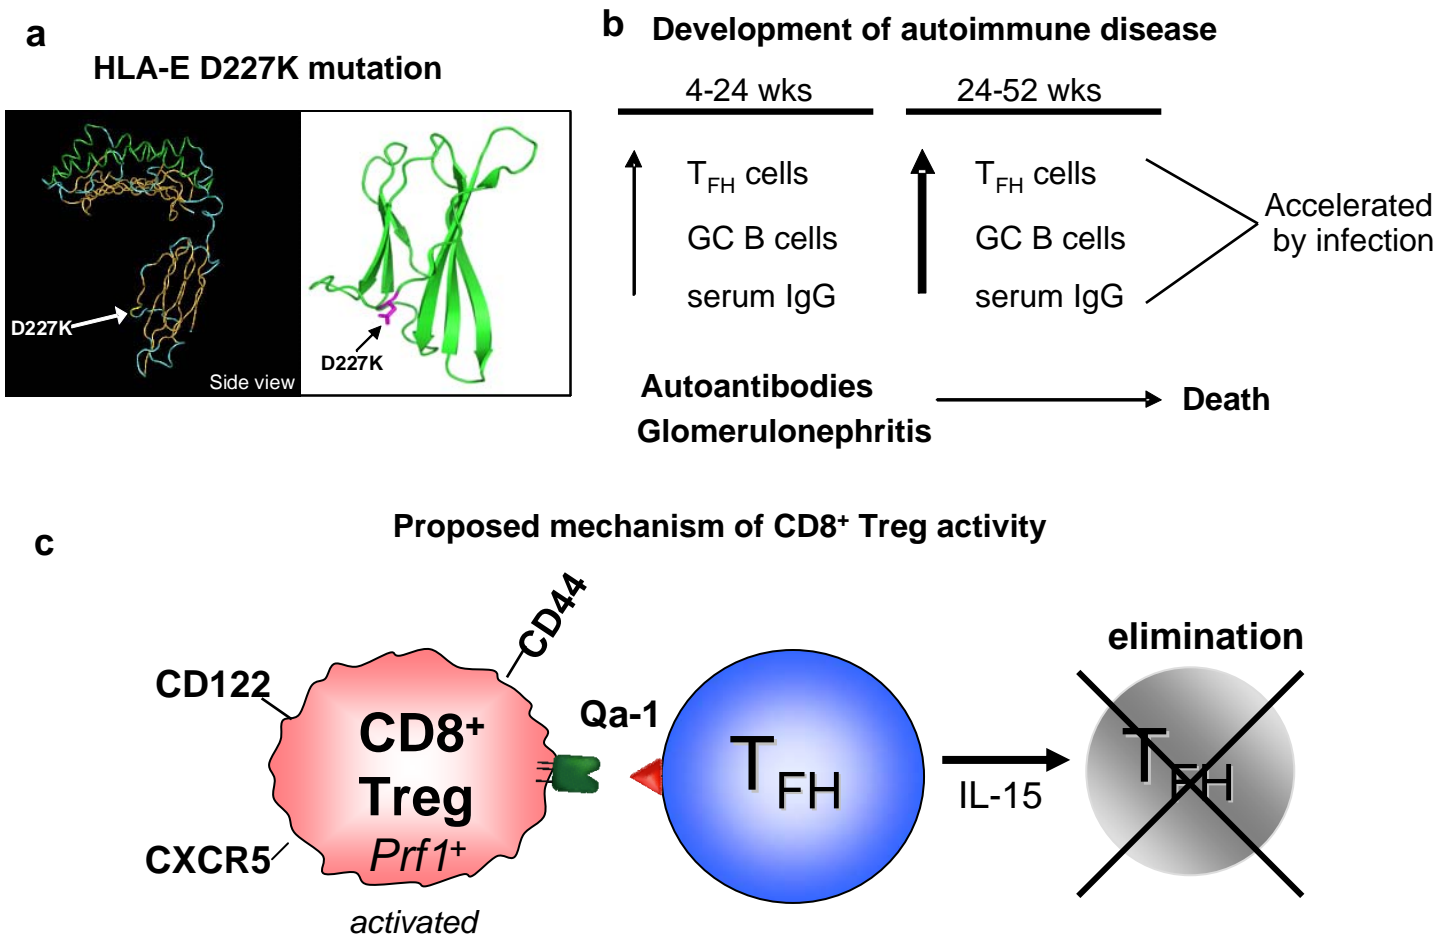

**Supplementary Figure 1. a) Three dimensional structure of HLA-E** and the position of the mutation that results in disruption of CD8 binding to HLA-E (or Qa-1) molecule. B6-Qa-1(D227K) knock-in mice were generated by mutating the amino acid position of 227 in CD8 binding alpha 3 domain of Qa-1 molecule from aspartic acid (**D**) to lysine (**K**). Expression of cell surface Qa-1 by activated CD4 cells from B6-Qa-1(D227K) knock-in mice was indistinguishable from B6-(Qa-1WT) mice<sup>9</sup>. Expression of the B6-Qa-1(D227K) mutation by L cells or activated CD4 cells failed to target these cells for lysis by Qa-1-restricted cytolytic T cells, while Qa-1/Qdm-dependent resistance of activated B6-Qa-1(D227K) CD4 cells to lysis by NKG2A<sup>+</sup> NK cells was unimpaired in vitro and in vivo<sup>9</sup>.

**b) Development of autoimmune disease in Qa-1 D227K mice.** The Qa-1 mutation delineated in **a** develop the autoimmune disease characterized by tissue-specific autoantibodies, invasion of non-lymphoid tissues by monocytes/ lymphocytes and lethal glomerulonephritis. This disorder is associated with enhanced numbers of T<sub>FH</sub> cells, activated lymphoid follicles, increased GC B cells, and is accelerated by viral infection.

**c) Proposed mechanism of CD8<sup>+</sup> Treg activity.** Activation of follicular helper T cells stimulates a subpopulation of Qa-1-restricted CD8<sup>+</sup> T cells that express the indicated surface molecules. These cells, termed CD8<sup>+</sup> Treg, may mediate perforin/ IL-15 dependent elimination of target Qa-1<sup>+</sup> T<sub>FH</sub>.

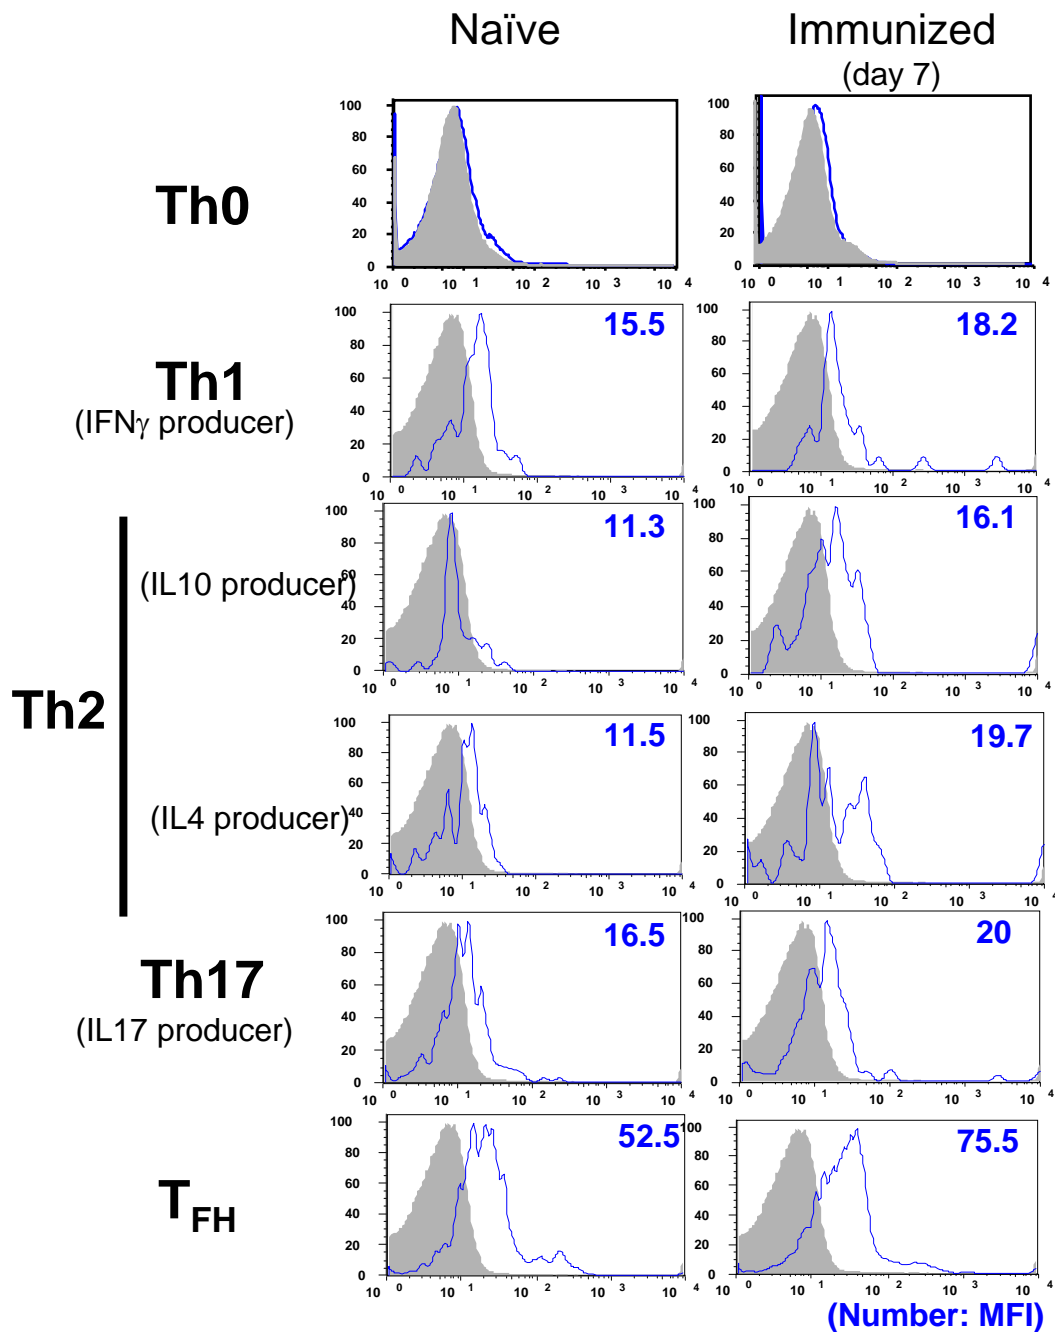

**Supplementary Figure 2. Qa-1 expression by Th cell lineages.**

Spleen cells from 6 week old naïve and KLH/CFA-immunized mice were analyzed for Qa-1 expression on cell surface. IFN $\gamma$ <sup>+</sup>IL-4<sup>-</sup> cells were defined as Th1 cells; IL-10 or IL-4 producers were defined as Th2 cells; IL-17 producers were defined as Th17 cells. T<sub>FH</sub> cells were identified by ICOS and B200 expression. Numbers shown represent mean fluorescence intensity (MFI).

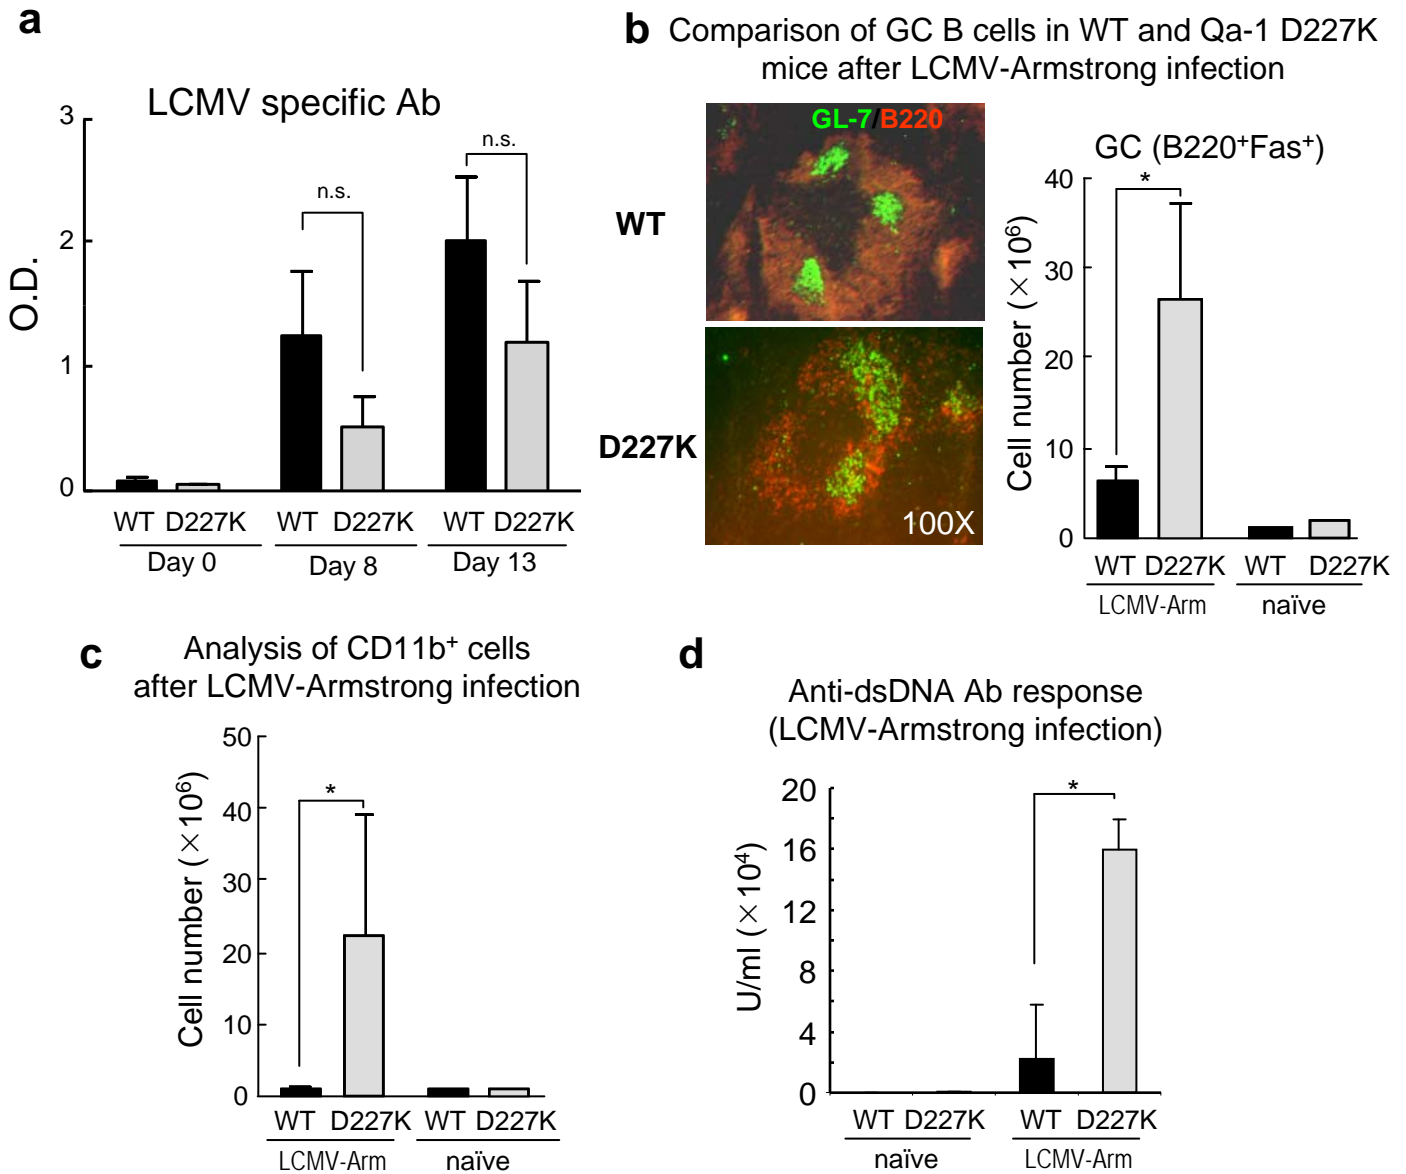

**Supplementary Figure 3. Immune response of B6-(Qa-1<sup>WT</sup>) and B6-Qa-1(D227K) mice upon LCMV-Armstrong infection.** 6m old WT B6 and B6-Qa-1(D227K) mice were infected i.p. with 10<sup>6</sup> PFU LCMV-Armstrong. At day 8, mice were reinfected i.p. with 10<sup>5</sup> PFU LCMV-Armstrong. At days 8 and 13, sera from naïve and LCMV-Armstrong-infected WT and B6-Qa-1(D227K) mice were analyzed for the production of LCMV specific antibodies (**a**). **b and c**) Splenocytes from naïve or LCMV-Armstrong infected WT or B6-Qa-1(D227K) mice were analyzed for immune cell composition. Spleens from LCMV-Armstrong infected WT or B6-Qa-1(D227K) mice were analyzed for GC formation by immunohistochemistry (**b**, left panel). Shown are representative B cell follicles stained for B220<sup>+</sup> cells (red) and GC B cells (GL-7<sup>+</sup>, green). Increased size of GC and loose distribution of GL-7<sup>+</sup> cells in B6-Qa-1(D227K) mice suggest robust B cell activation and advanced stage of GC reaction characterized by light zone dominant GC phenotype. An ~5-fold increase in GC phenotype B cells (B220<sup>+</sup>Fas<sup>+</sup>) (**b**, right panel) and 20-fold increase in CD11b<sup>+</sup> cells (**c**) was detected in spleen of B6-Qa-1(D227K) mice upon LCMV-Armstrong infection compared to B6-(Qa-1<sup>WT</sup>) mice. (**d**) 6-8 week old WT B6 and D227K mice were infected i.p. with 10<sup>6</sup> PFU LCMV-Armstrong. At day 8, mice were reinfected i.p. with 10<sup>5</sup> PFU LCMV-Armstrong. 28 days after primary infection, serum from LCMV-infected WT B6 and D227K mice was analyzed for the production of antibodies specific for dsDNA. Data represent mean ± SEM. (3-6 mice/group)

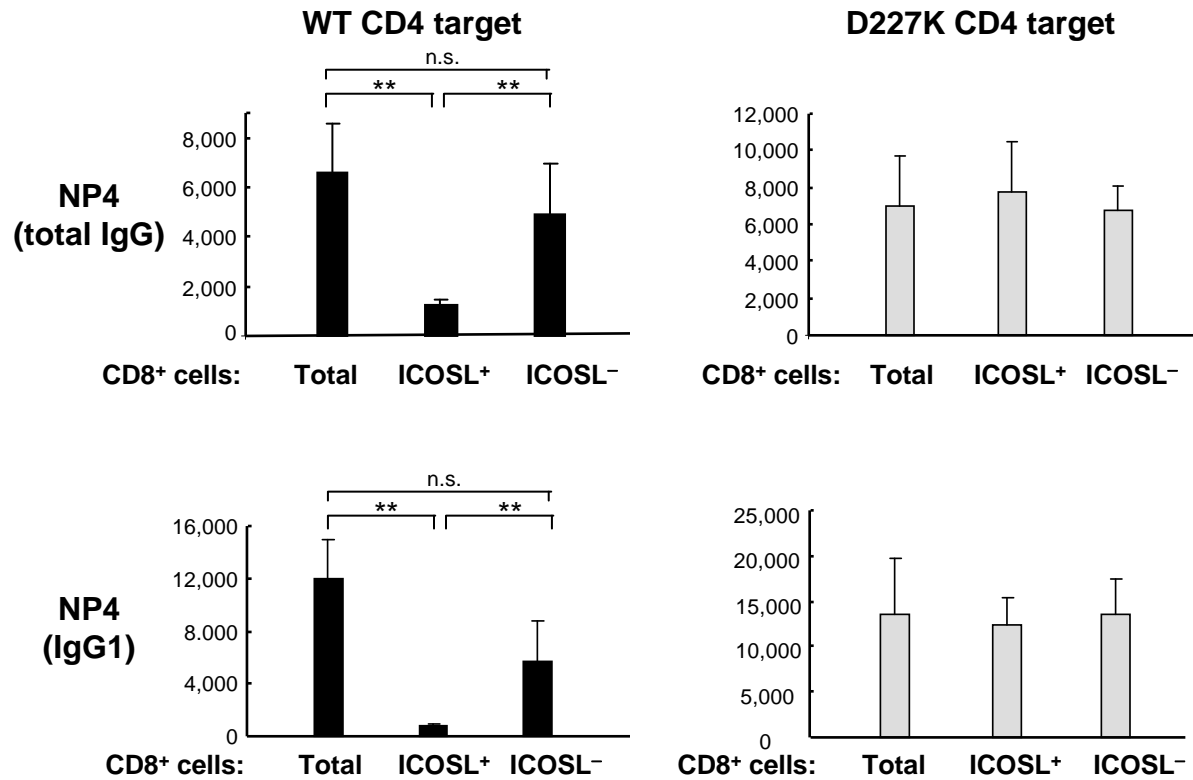

**Supplementary Figure 4. Suppression of high affinity Ab response by ICOSL<sup>+</sup> CD8 cells, but not by total CD8 or ICOSL<sup>-</sup> CD8 cells:**

*Rag2*<sup>-/-</sup> mice were transferred with  $2 \times 10^6$  naïve WT B cells along with  $1 \times 10^6$  naïve WT or B6-Qa-1 D227K CD4 cells. In addition, *Rag2*<sup>-/-</sup> mice were given either unseparated CD8 cells or ICOSL<sup>+</sup> enriched and ICOSL<sup>-</sup> CD8 cells from KLH/CFA-immunized mice. Immediately after cell transfer, *Rag2*<sup>-/-</sup> mice were immunized i.p. with 100  $\mu$ g NP<sub>19</sub>-KLH in CFA. Mice were reimmunized i.p. with 50  $\mu$ g NP19-KLH in IFA and the NP specific Ab response was measured by ELISA.

## Qa-1 expression on B cells

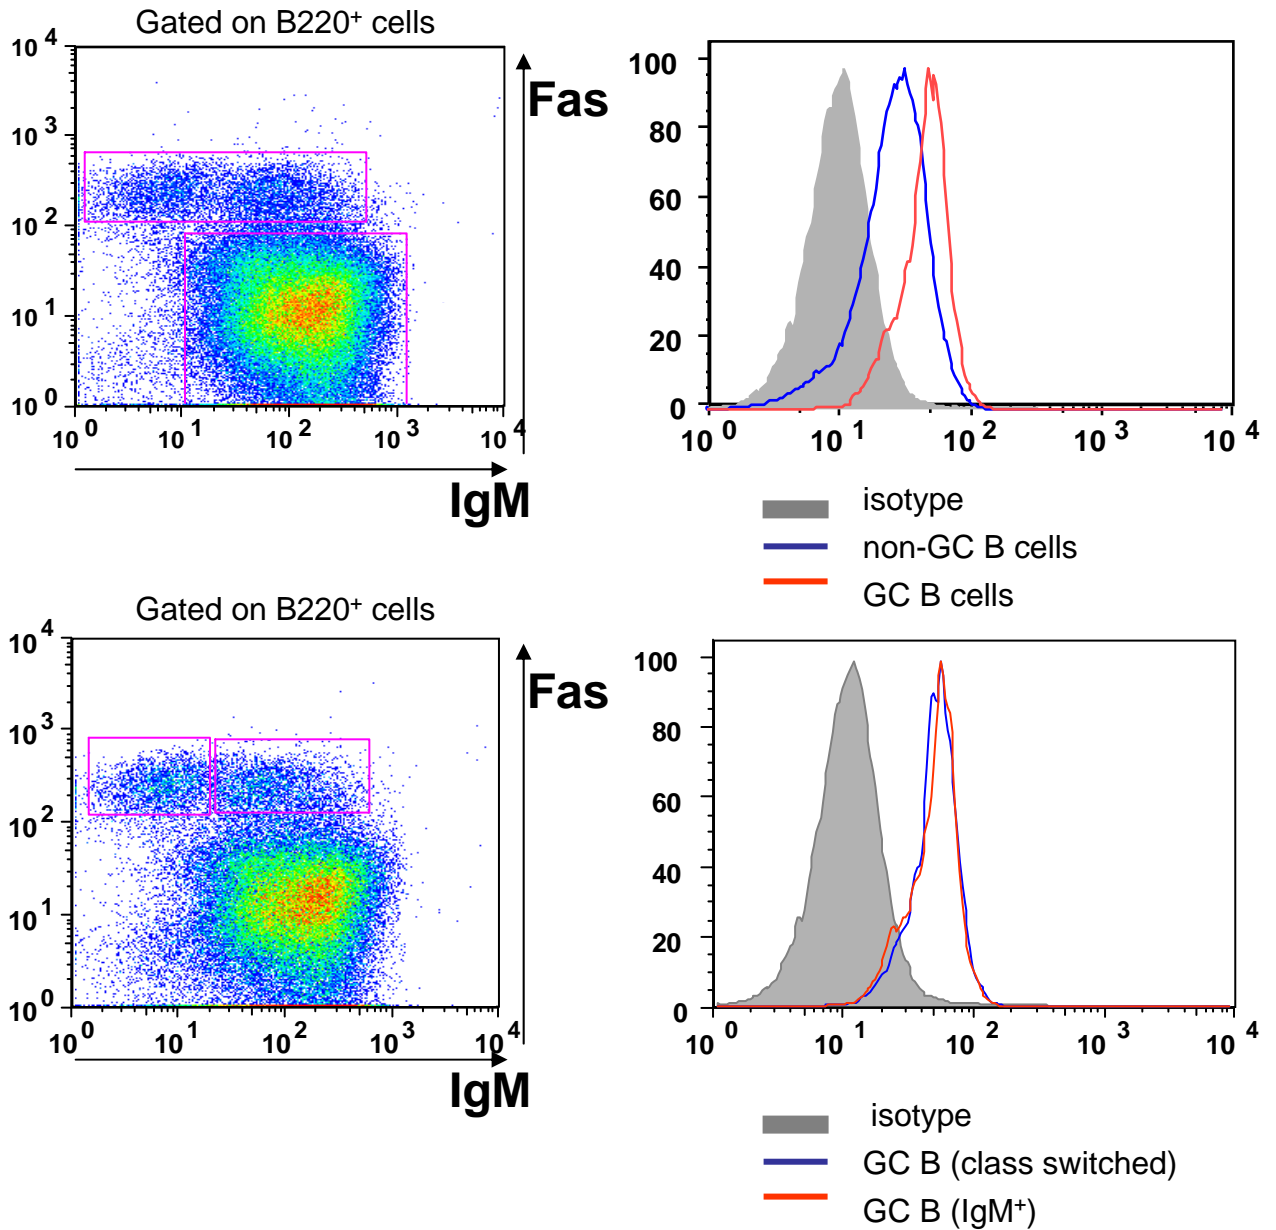

### Supplementary Figure 5. Expression of Qa-1 by naïve and GC B cells.

WT B6 mice were immunized with 100  $\mu$ g KLH in CFA. Seven days after immunization, splenic B cells were analyzed for Qa-1 expression. Levels of Qa-1 expression on naïve and activated B cells (GC B cells) were analyzed (**upper panel**). Levels of Qa-1 expression by class-switched and IgM<sup>+</sup> GC B cell were compared (**lower panel**) .

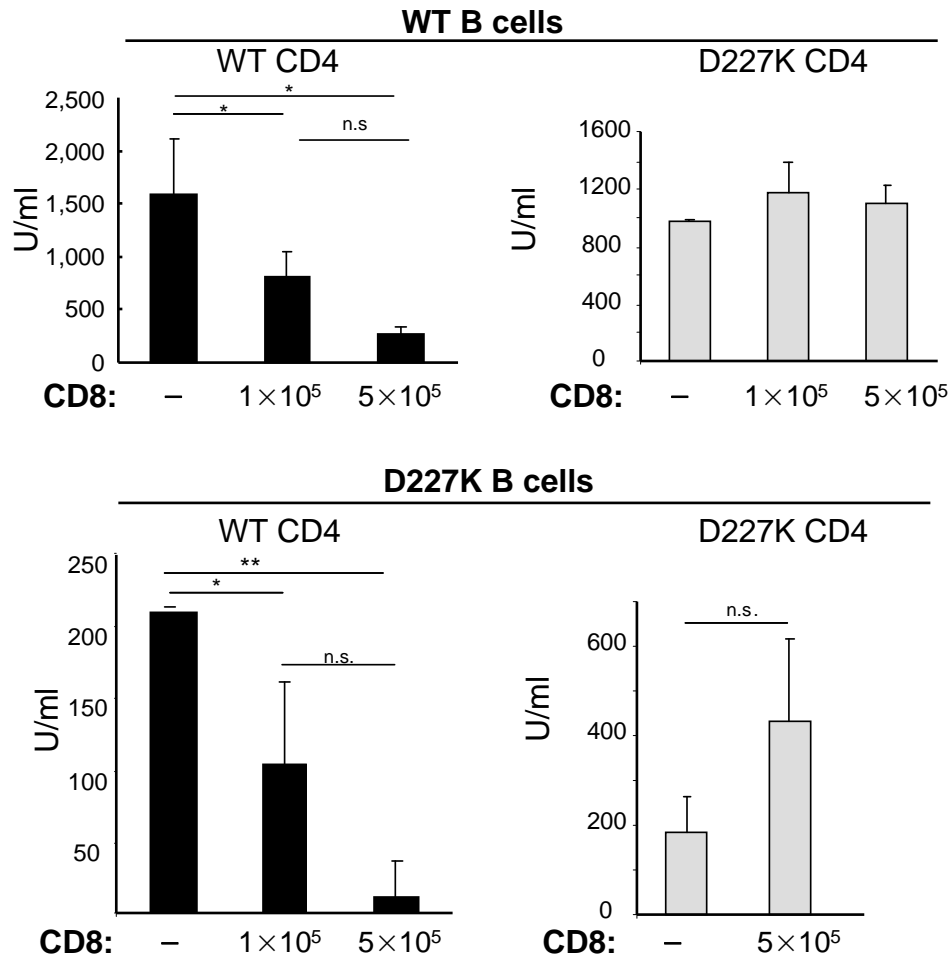

**Supplementary Figure 6. Ab response after transfer of B cells, CD4 cells and CD8 cells into *Rag2*<sup>-/-</sup> mice.**

$2 \times 10^6$  naïve B cells from 2 month old B6.Qa-1 WT (upper panel) or B6.Qa-1(D227K) mice (lower panel) were transferred along with  $1 \times 10^6$  CD25<sup>+</sup> depleted CD4 cells from B6.Qa-1(WT) or B6.Qa-1(D227K) mice. Titrated numbers of CD44<sup>+</sup> CD8 cells isolated from KLH/CFA-immunized mice were given to *Rag2*<sup>-/-</sup> mice. Immediately after transfer, *Rag2*<sup>-/-</sup> recipients were immunized i.p. with 100  $\mu$ g KLH in CFA. At day 10, mice were reimmunized i.p. with 50  $\mu$ g KLH in IFA. At day 17, NP-specific Ab responses were measured by ELISA, as summarized below:

| <u>B cells</u> | <u>CD4 cells</u> | <u>Suppression</u> |
|----------------|------------------|--------------------|
| WT             | WT               | +++                |
| WT             | D227K            | -                  |
| D227K          | WT               | +++                |
| D227K          | D227K            | -                  |

## Target cells of Qa-1-restricted suppression

### In vivo suppression of T<sub>FH</sub> cells by in vitro stimulated ICOSL<sup>+</sup> CD8 cells

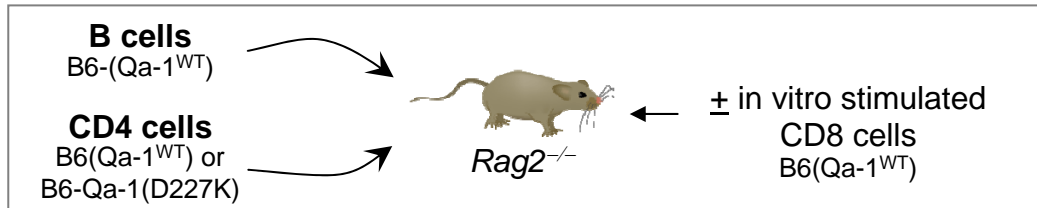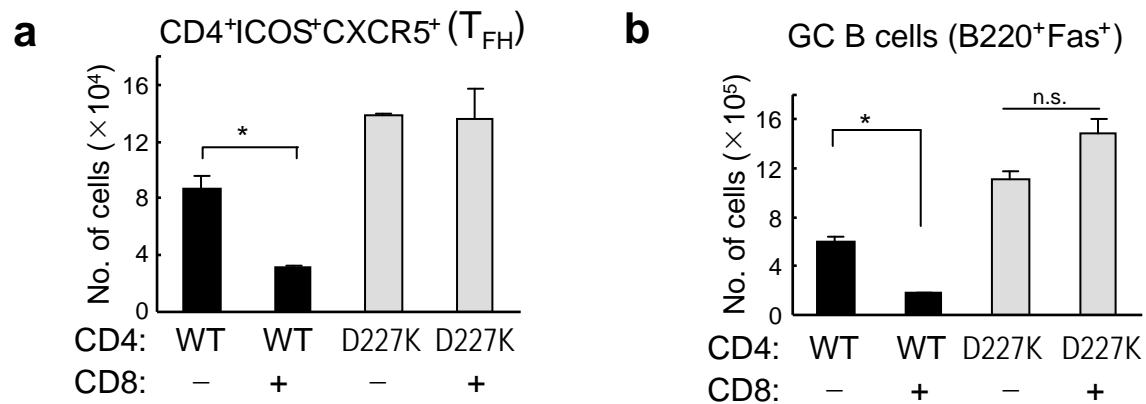

### Supplementary Figure 7. Suppression of T<sub>FH</sub> cells by in vitro stimulated ICOSL<sup>+</sup> CD8 cells.

*Rag2*<sup>-/-</sup> mice were given  $2 \times 10^6$  naïve B cells from WT mice and  $10^6$  CD4 cells from either B6.Qa-1(WT) or B6.Qa-1(D227K) mice. After injection of  $2 \times 10^5$  in vitro-stimulated ICOSL<sup>+</sup> CD8<sup>+</sup> cells into each *Rag2*<sup>-/-</sup> recipient, mice were immunized i.p. with 100 µg NP<sub>19</sub>-KLH in CFA and reimmunized i.p. with 50 µg NP<sub>19</sub>-KLH in IFA at day 12. Spleen cells from different groups of *Rag2*<sup>-/-</sup> hosts were analyzed for levels of **a**) follicular helper T cells (CD4<sup>+</sup>ICOS<sup>+</sup>CXCR5<sup>+</sup>) and **b**) GC B cells (B220<sup>+</sup>Fas<sup>+</sup>) by FACS at day 28 after primary immunization. Mean cellularity ± SEM is shown (n=3-5/group).

## Anti-dsDNA Ab generation in *Rag2*<sup>-/-</sup> recipients

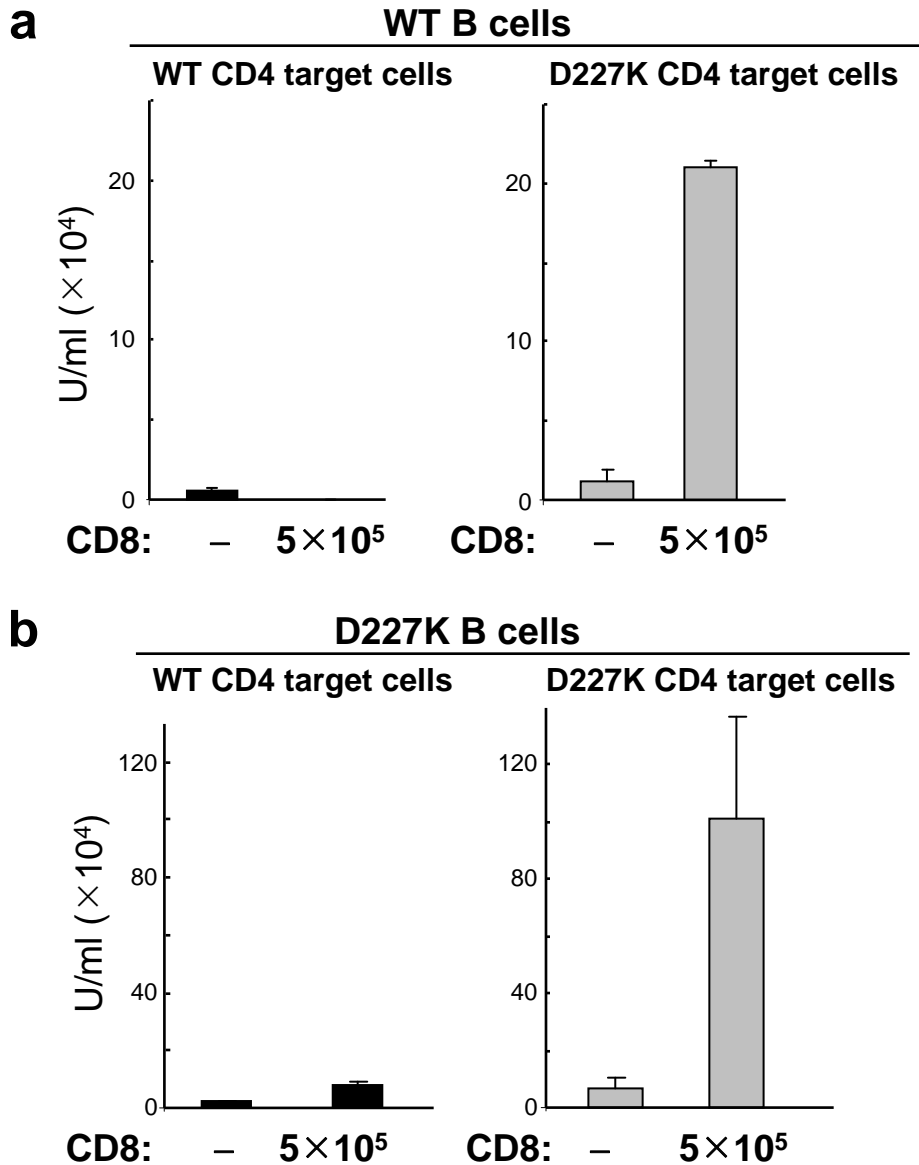

### Supplementary Figure 8. Autoantibody generation after transfer of B, CD4 and CD8 cells into *Rag2*<sup>-/-</sup> hosts.

$2 \times 10^6$  naïve B cells from 2 month old B6.Qa-1(WT) mice (a) and B6.Qa-1(D227K) mice (b) were transferred along with  $10^6$  CD25<sup>+</sup> depleted CD4 T cells from WT or D227K mice.  $5 \times 10^5$  CD44<sup>+</sup> CD8 cells isolated from KLH/CFA-immunized mice were transferred into *Rag2*<sup>-/-</sup> hosts. Immediately after transfer, mice were immunized i.p. with 100  $\mu$ g KLH in CFA. At day 10, mice were reimmunized i.p. with 50  $\mu$ g KLH in IFA. At day 21, anti-dsDNA Ab was measured by ELISA.



## Cytokine production by in vitro generated T<sub>H</sub> sublineages

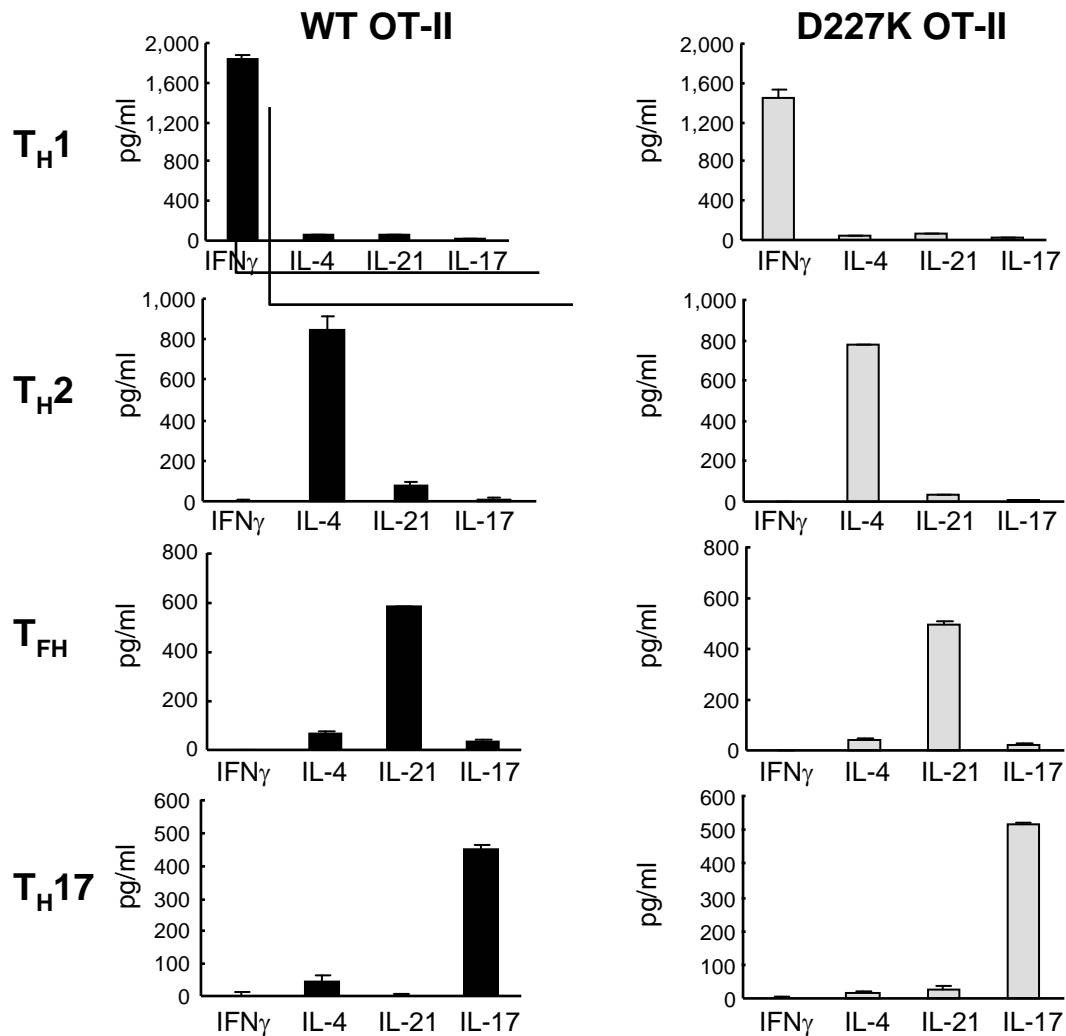

### Supplementary Figure 9. T<sub>H</sub> lineage differentiation in vitro: Cytokine profiles.

T<sub>H1</sub>: 5 ng/ml rIL-12 and 10  $\mu$ g/ml anti-IL-4 Ab, T<sub>H2</sub>: 10 ng/ml rIL-4 Ab, 10  $\mu$ g/ml anti-IL-12 Ab, 10  $\mu$ g/ml anti-IFN $\gamma$  Ab, T<sub>FH</sub>: 50 ng/ml IL-21, 10  $\mu$ g/ml anti-IL-4 Ab, 10  $\mu$ g/ml IFN $\gamma$  Ab, 20  $\mu$ g/ml anti-TGF $\beta$  Ab and 20 ng/ml rIL-6, T<sub>H17</sub>: 3 ng/ml TGF $\beta$ , 20 ng/ml rIL-6, 20 ng/ml rIL-23, 10  $\mu$ g/ml anti-IL-4 Ab, 10  $\mu$ g/ml anti-IFN $\gamma$  Ab, 10  $\mu$ g/ml anti-IL-12 Ab. At day 5, cells were harvested and 10<sup>5</sup> cells were restimulated with 0.5  $\mu$ g/ml OT-II peptide for 24h. Cell supernatants were subjected to cytokine analysis by ELISA.

## NP specific Ab response

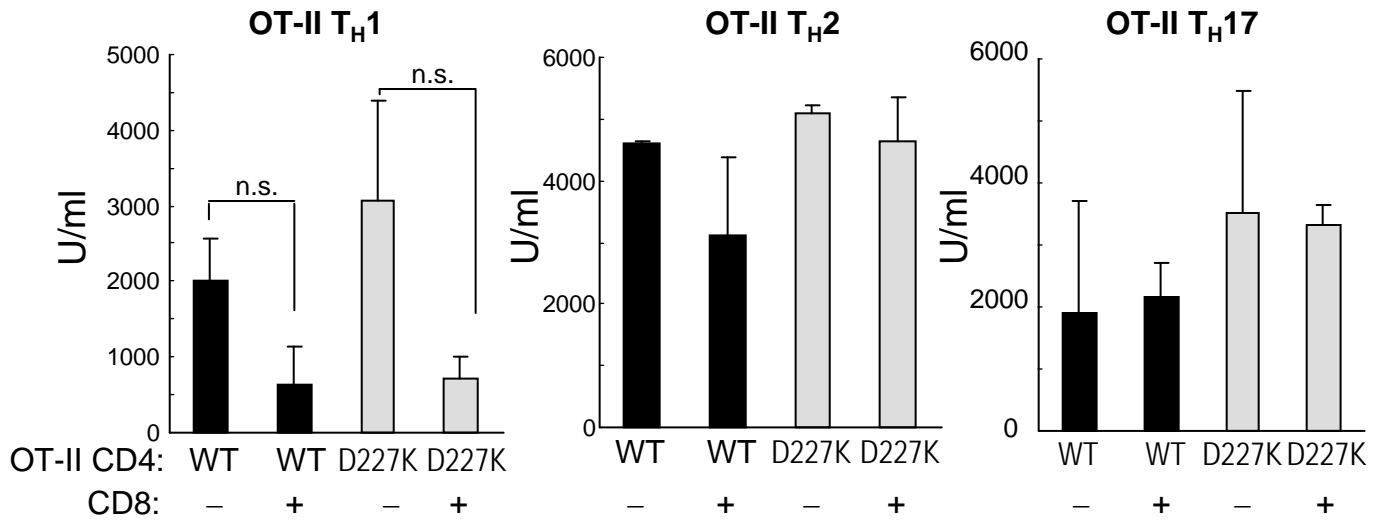

### Supplementary Figure 10. Transfer of in vitro differentiated T<sub>H</sub> sublineages and Ab response.

Naïve OT-II cells were differentiated into T<sub>H</sub>1, T<sub>H</sub>2 and T<sub>H</sub>17 cells using following protocol: 1 µg/ml OT-II peptide was used. T<sub>H</sub>1: 5 ng/ml rmlL-12 and 10 µg/ml anti-IL4 Ab, T<sub>H</sub>2: 10 ng/ml rmlL-4 Ab, 10 µg/ml anti-IL-12 Ab, 10 µg/ml anti-IFN<sub>γ</sub> Ab, T<sub>FH</sub>: 50 ng/ml IL-21, 10 µg/ml anti-IL-4 Ab, 10 µg/ml anti-IFN<sub>γ</sub> Ab, 20 µg/ml anti-TGFβ Ab and 20 ng/ml rmlL-6, T<sub>H</sub>17: 3 ng/ml TGFβ, 20 ng/ml rIL-6, 20 ng/ml rIL-23, 10 µg/ml anti-IL-4 Ab, 10 µg/ml anti-IFN<sub>γ</sub> Ab, 10 µg/ml anti-IL-12 Ab. At day 5, cells were harvested and 1×10<sup>5</sup> cells were transferred into *Rag2*<sup>-/-</sup> recipients along with 2×10<sup>6</sup> WT naïve B cells and 2×10<sup>5</sup> sorted CD44<sup>+</sup> CD8 cells from KLH/CFA-immunized B6 donors. Immediately after transfer, *Rag2*<sup>-/-</sup> mice were immunized i.p. with 100 µg/ml NP<sub>13</sub>-OVA in CFA. 15 days later, NP<sub>23</sub> binding IgG1 responses were measured by ELISA.

## Mechanism of Qa-1-restricted suppression: Contribution of perforin to Qa-1-restricted inhibition

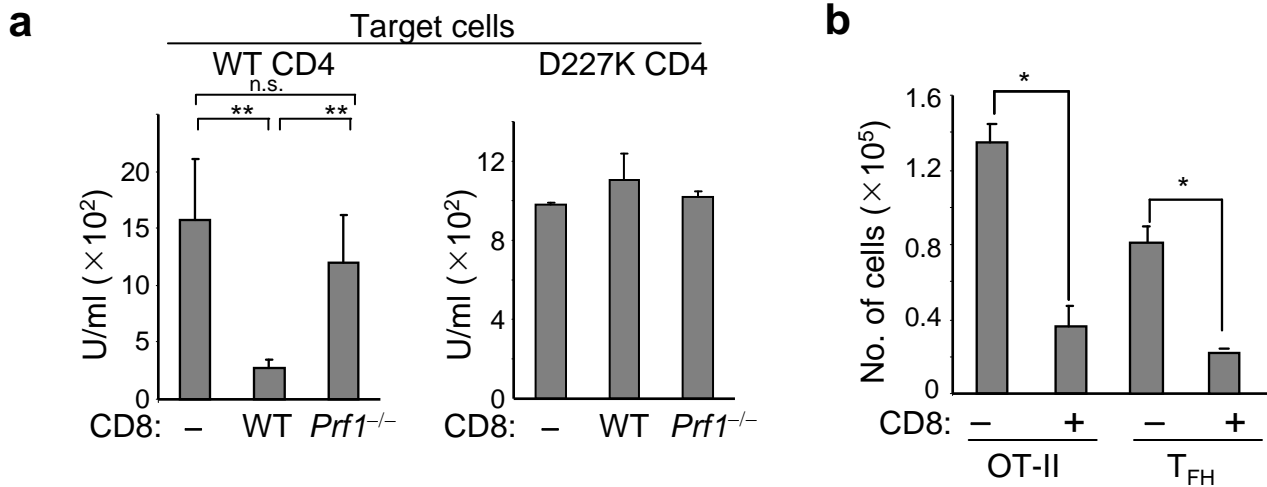

### Supplementary Figure 11. Perforin dependent suppression of T<sub>FH</sub> by CD8 Treg:

Ab response after transfer of B, CD4 and CD8 cells into *Rag2*<sup>-/-</sup> mice.  $2 \times 10^6$  WT naïve B cells were transferred along with  $1 \times 10^6$  CD25<sup>+</sup> depleted CD4 cells from B6.Qa-1(WT) or B6.Qa-1(D227K) mice into *Rag2*<sup>-/-</sup> hosts. CD44<sup>+</sup> cells isolated from KLH/CFA immunized WT or *Prf1*<sup>-/-</sup> mice were transferred into *Rag2*<sup>-/-</sup> hosts. Immediately after cell transfer, *Rag2*<sup>-/-</sup> recipients were immunized i.p. with 100  $\mu$ g NP<sub>19</sub>-KLH in CFA. At day 10, mice were reimmunized i.p. with 50  $\mu$ g NP<sub>19</sub>-KLH in IFA and NP specific Ab responses were measured by ELISA seven days later (a). (b) Enumeration of OT-II and T<sub>FH</sub> cells in *Rag2*<sup>-/-</sup>  $\gamma$ C<sup>-/-</sup> recipients: Naïve WT OT-II ( $5 \times 10^5$ ) were transferred along with CD8 cells ( $7 \times 10^5$ ) from immune donors into *Rag2*<sup>-/-</sup>  $\gamma$ C<sup>-/-</sup> mice, followed by immunization with 100  $\mu$ g NP<sub>13</sub>-OVA in CFA and boosting with 50  $\mu$ g NP<sub>13</sub>-OVA in IFA at day 10. On day 18, the numbers of OT-II cells (V $\beta$ 5<sup>+</sup>CD4<sup>+</sup>) and OT-II cells with a T<sub>FH</sub> phenotype (ICOS<sup>+</sup>CD200<sup>+</sup>CD4<sup>+</sup>) in spleen were enumerated by FACS analysis.

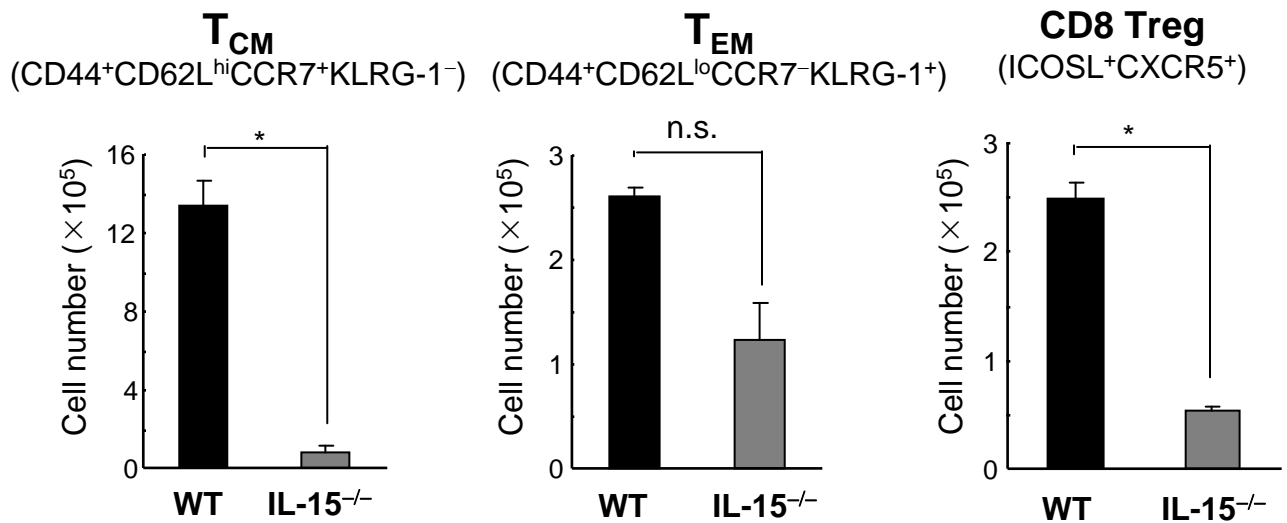

**Supplementary Figure 12. Memory and regulatory CD8 T cells in WT and IL-15<sup>-/-</sup> mice:** WT B6 and IL-15<sup>-/-</sup> mice were immunized i.p. with 100 μg KLH/CFA. 38 days later, the number of CD8 memory subsets and ICOSL<sup>+</sup>CXCR5<sup>+</sup> CD8 cells was analyzed by FACS. Central memory (T<sub>CM</sub>) and effector memory (T<sub>EM</sub>) CD8 cells were defined according to differential expression of CD44, CD62L, CCR7 and KLRG-1.

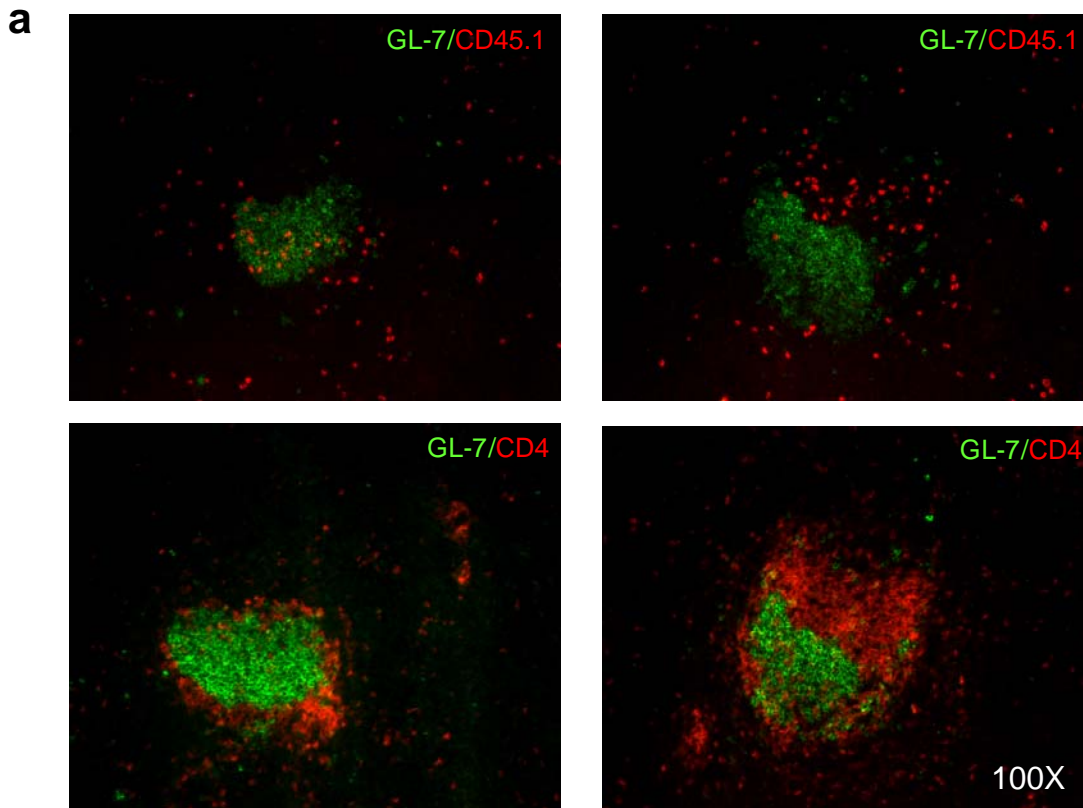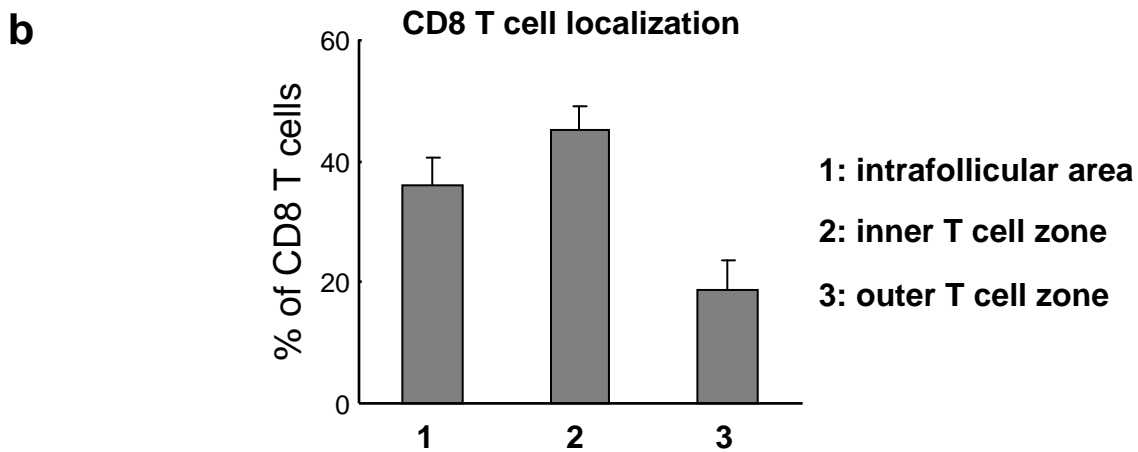

**Supplementary Figure 13. Follicular localization of CD8 cells:**

*Rag2*<sup>-/-</sup> mice were transferred with  $3 \times 10^6$  WT B cells and  $2 \times 10^6$  WT CD4 cells. Mice were immunized with 100  $\mu$ g NP<sub>19</sub>-KLH. At day 10 post immunization,  $1 \times 10^6$  sorted CD44<sup>+</sup> CD8 cells isolated from KLH/CFA-immunized CD45.1 syngeneic mice were transferred into *Rag2*<sup>-/-</sup> hosts. Spleens from these mice were harvested at day 5. Localization of GC B cells, CD4 cells and CD8 cells was analyzed by staining spleen tissue sections with GL-7 and anti-CD45.1 or GL-7 and anti-CD4 Abs (a). The percent of CD8 cells that migrated into B and T cell zones was quantified by counting cells within the GL-7<sup>+</sup> area, the inner CD4 T cell area and outer CD4 T cell zone. The inner T cell zone was defined by the area with sporadic distribution of B cells. Outer T cell area was defined by the outer layer of the CD4<sup>+</sup> T cell zone with no B cells (b).

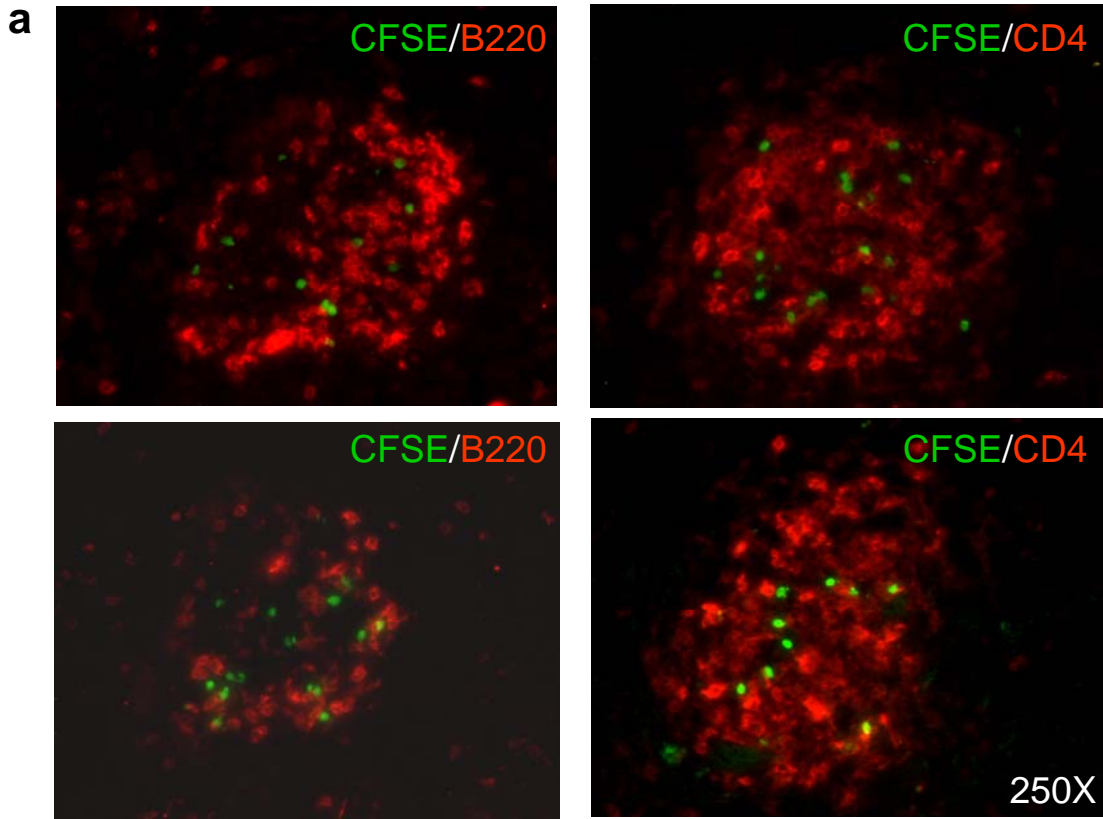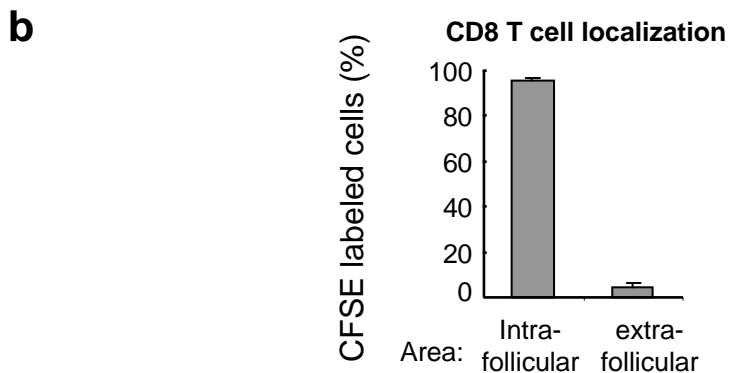

**Supplementary Figure 14. Follicular localization of CD8 cells:**

*Rag2*<sup>-/-</sup> mice were transferred with  $3 \times 10^6$  WT B cells and  $2 \times 10^6$  WT CD4 cells before immunization with 100 mg NP19-KLH. Three days later,  $0.5 \times 10^6$  sorted CXCR5<sup>+</sup> CD8 cells (>99% pure) from KLH/CFA-immunized mice were CFSE labeled before transfer into *Rag2*<sup>-/-</sup> hosts and harvesting 24h later. Localization of B cells and CD4 cells in splenic tissue sections was determined using anti-B220 and anti-CD4 antibodies. Localization of CXCR5<sup>+</sup> CD8 cells was detected by green fluorescence (CFSE). Two independent follicles in consecutive sections are shown (a). Quantification of CD8 cells within or outside of follicular areas is shown (20 different follicles were analyzed) (b).

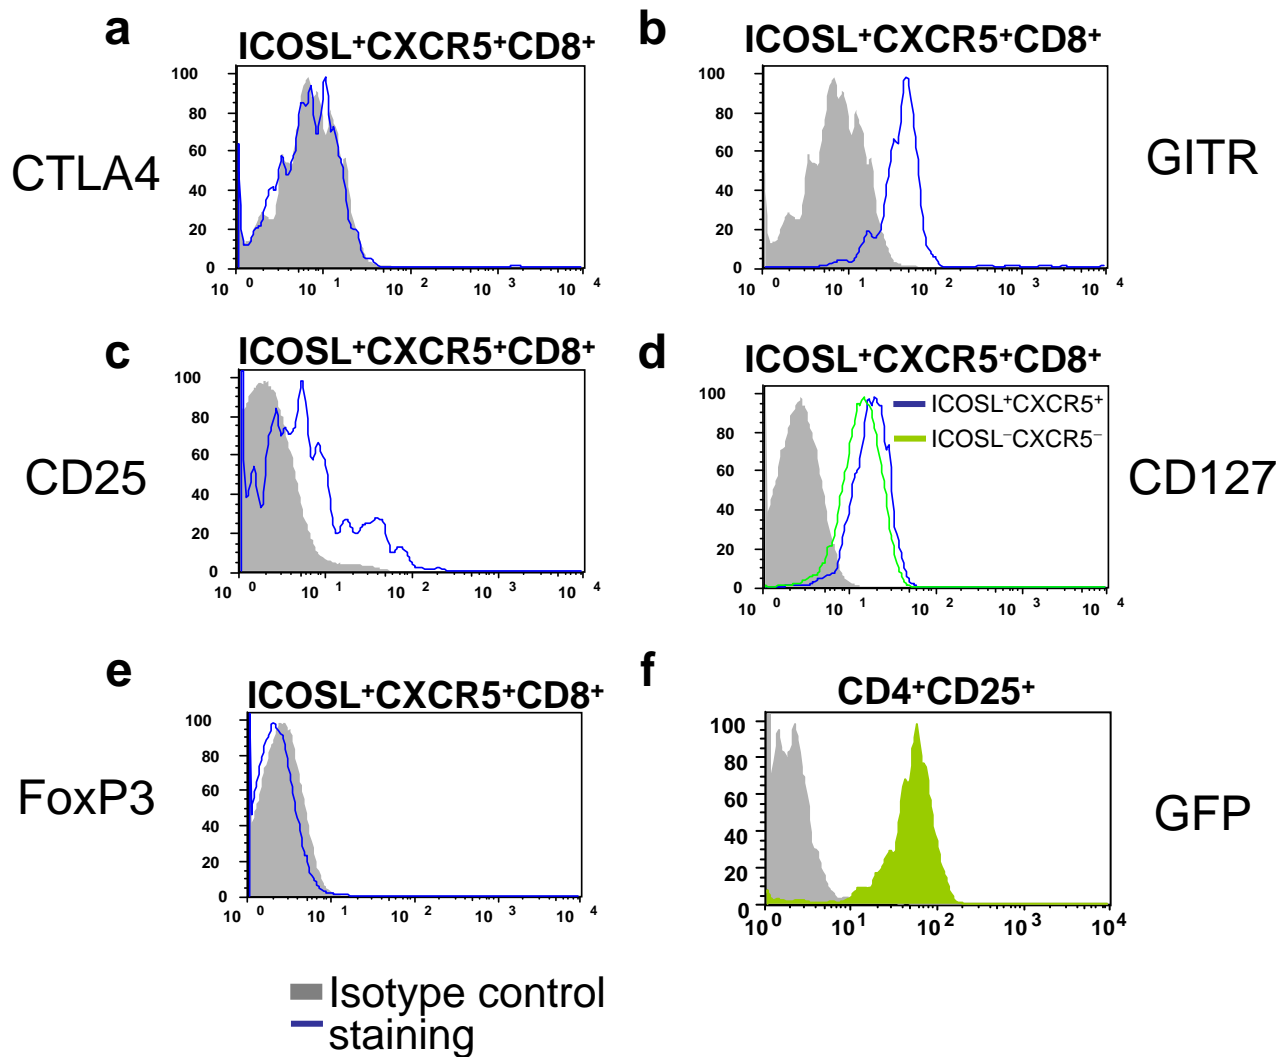

**Supplementary Figure 15. Analysis of expression of canonical CD4 Treg markers.** ICOSL<sup>+</sup>CXCR5<sup>+</sup> CD8 T cells from B6 mice one week after immunization with 100  $\mu$ g KLH/CFA were examined for expression of CTLA-4 (a), GITR (b), CD25 (c) and IL-7R $\alpha$  (CD127) (d) using appropriate antibodies and isotype controls. ICOSL<sup>+</sup>CXCR5<sup>+</sup> CD8 T cells from FoxP3-GFP knockin mice (immunized with 100  $\mu$ g KLH/ CFA i.p. as above) were also examined for FoxP3 by measuring GFP expression (e). The level of GFP expression by CD4<sup>+</sup>CD25<sup>+</sup> cells from FoxP3-GFP mice (positive control) is shown by comparing with CD4<sup>+</sup>CD25<sup>-</sup> cells (negative control) (f). Groups a-e are gated on ICOSL<sup>+</sup>CXCR5<sup>+</sup> CD8 cells. The level of CD127 expression by ICOSL<sup>+</sup>CXCR5<sup>+</sup> CD8 cells was compared to ICOSL<sup>-</sup>CXCR5<sup>-</sup> cells (d).

**Phenotype of in vitro differentiated OT-II T<sub>FH</sub> cell  
(no IL-6 supplementation)**

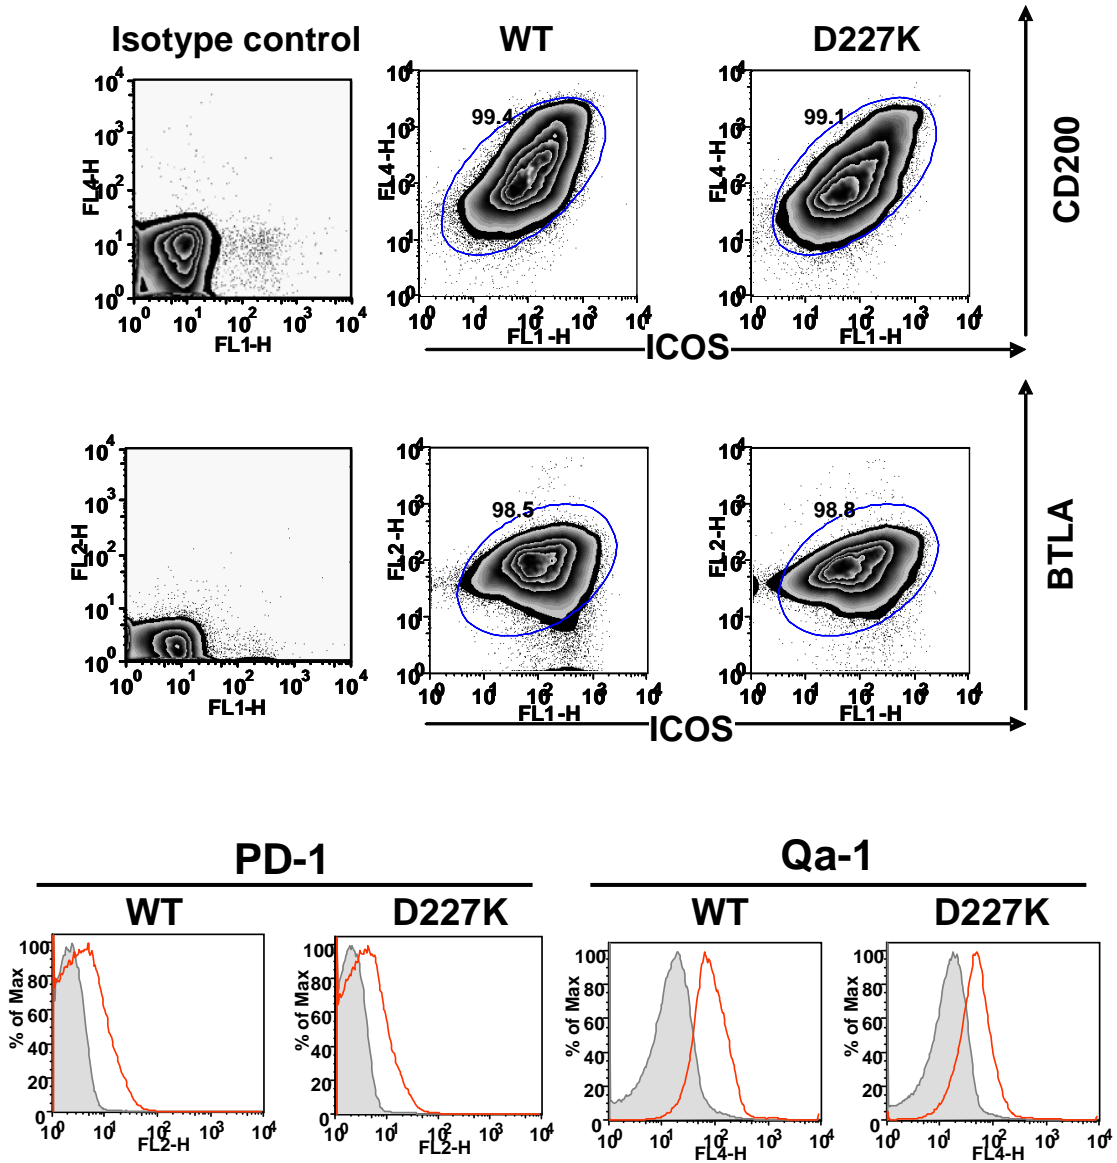

**Supplementary Figure 16. Phenotype of OT-II cells confirmed under T<sub>FH</sub> conditions.** Naïve OT-II cells (CD44<sup>+</sup>CD62L<sup>hi</sup>) from WT and D227K mice were stimulated with 1 µg/ml OT-II peptide, 50 ng/ml IL-21, 10 µg/ml anti-IFN $\gamma$ , 10 µg/ml anti-IL-4 and 20 µg/ml anti-TGF $\beta$  Abs for 5 days. Surface expression of ICOS, OX2 (CD200), BTLA, PD-1 and Qa-1 was analyzed by FACS.



## Phenotype of in vitro differentiated OT-II T<sub>FH</sub> cells (with IL-6 supplementation)

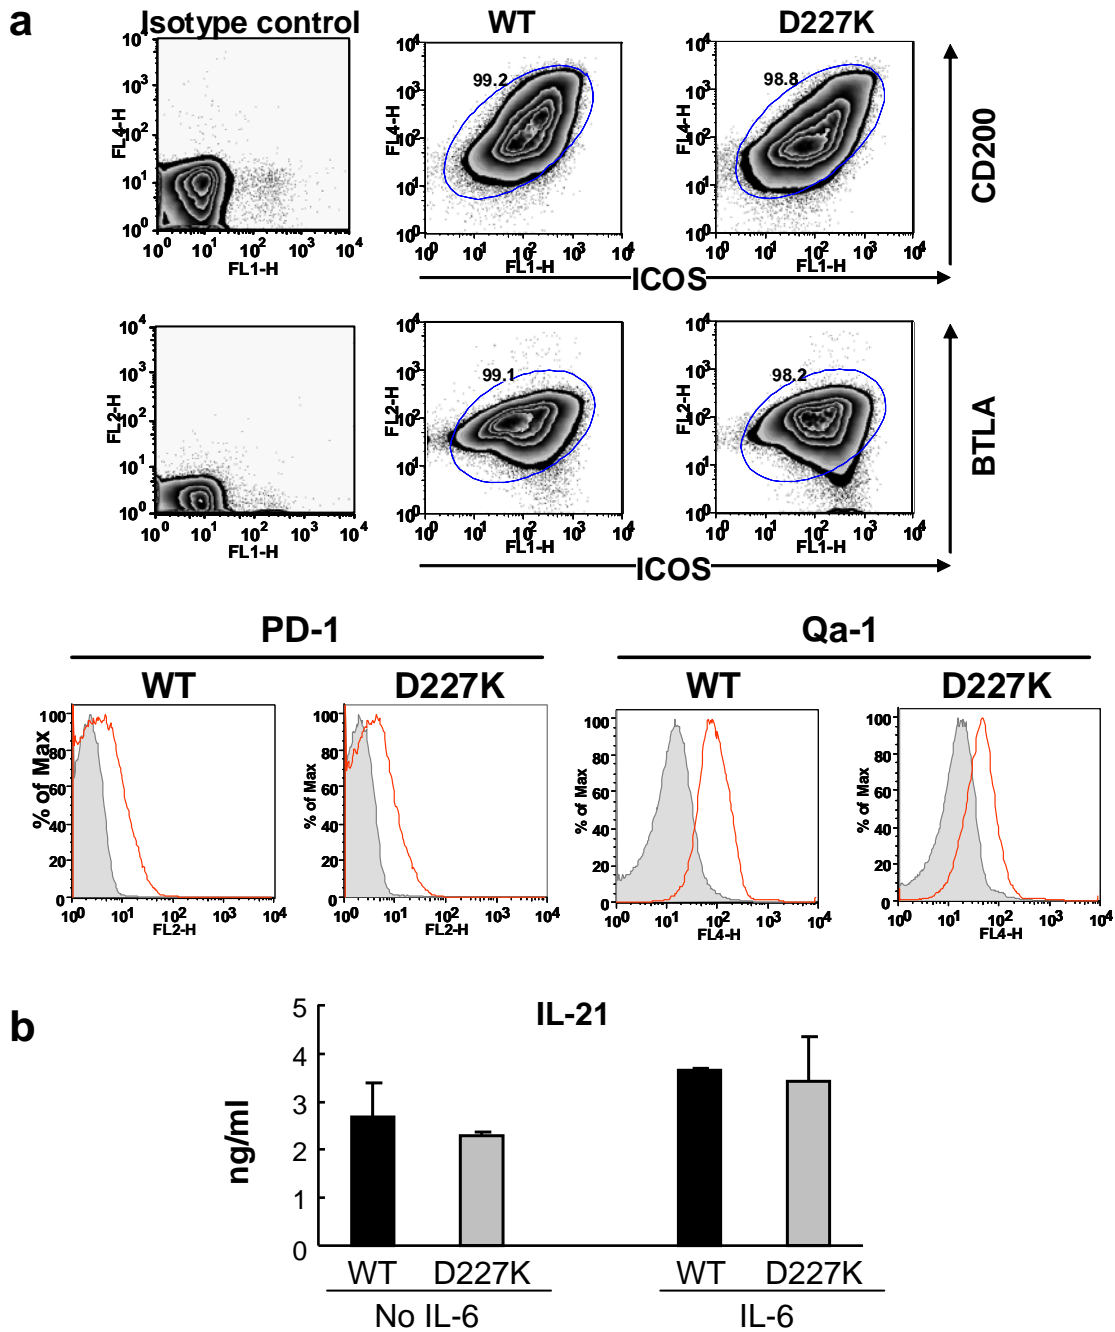

### Supplementary Figure 17. Phenotype of OT-II cells confirmed under T<sub>FH</sub> conditions.

**a**) Naïve OT-II cells (CD44<sup>low</sup>CD62L<sup>hi</sup>) from WT and D227K mice were stimulated with 1 µg/ml OT-II peptide, 50 ng/ml IL-21, 20 ng/ml IL-6, 10 µg/ml anti-IFN $\gamma$ , 10 µg/ml anti-IL-4 and 20 µg/ml anti-TGF $\beta$  Abs for 5 days. Surface expression of ICOS, OX2 (CD200), BTLA, PD-1 and Qa-1 was analyzed by FACS. **b**) At day 5, cells were harvested and  $1 \times 10^5$  cells were restimulated with 1 µg/ml anti-CD3 Ab for 24 hrs. Production of IL-21 was compared in T<sub>FH</sub> culture in the presence or absence of IL-6. IL-6 supplementation did not affect the surface phenotype or IL-21 cytokine response of OT-II T<sub>FH</sub> cells.
